# Supplementary material for: Improvement of Albendazole Bioavailability with Menbutone Administration in Sheep
Source: MDPI journal article supplement (doi:10.3390/ani12040463), 2022-02-14
Supplement: s1 [file s1]

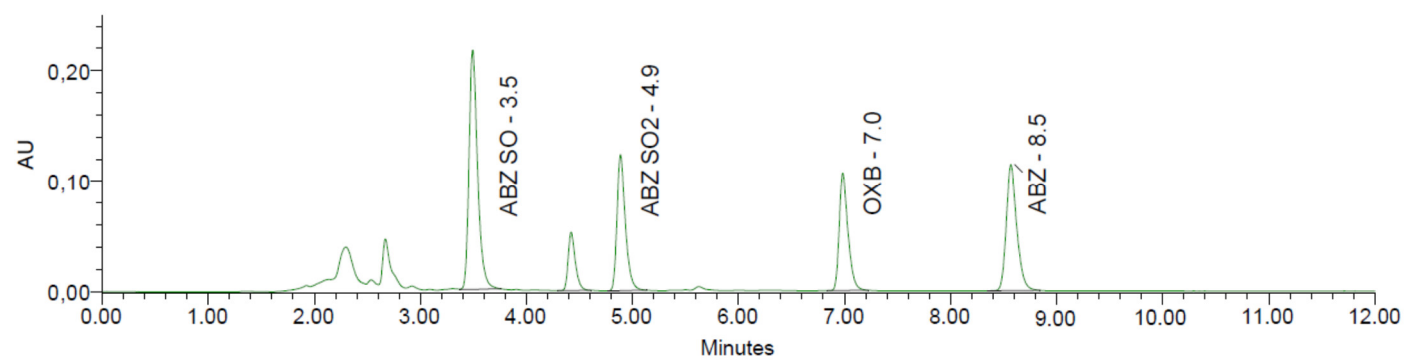

**Supplementary Figure S1.** Representative HPLC chromatogram of plasma sample fortified with ABZ (1  $\mu\text{g/mL}$ ), ABZSO (1  $\mu\text{g/mL}$ ), ABZSO<sub>2</sub> (1  $\mu\text{g/mL}$ ), and IS (1  $\mu\text{g/mL}$ ).

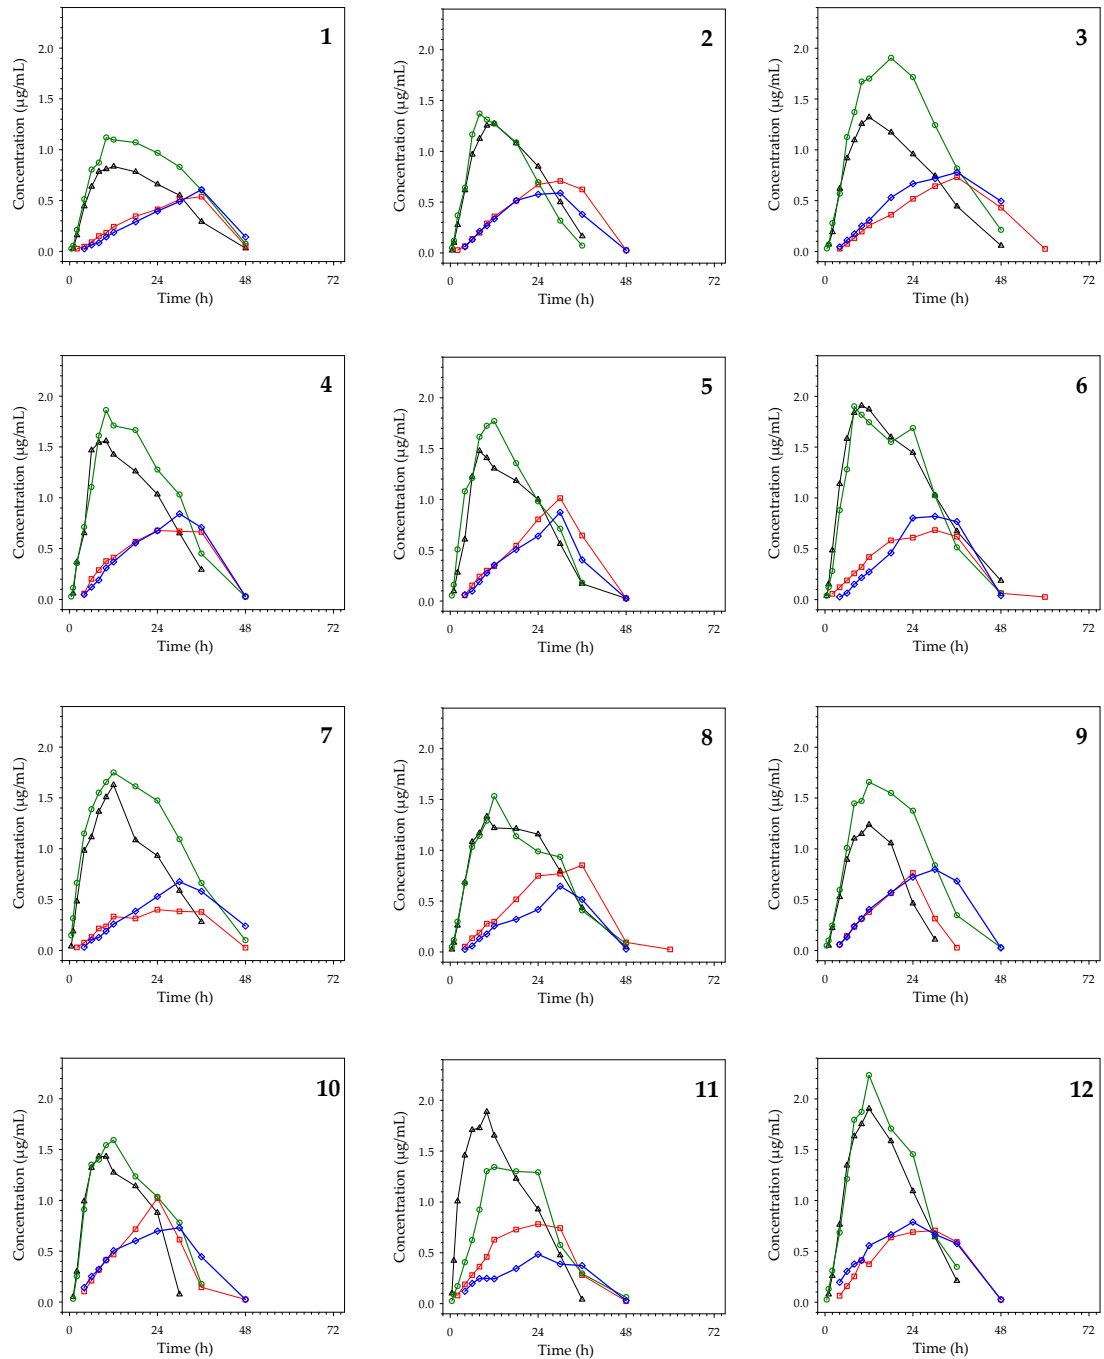

**Supplementary Figure S2.** Individual plasma concentrations of ABZSO ( $\Delta$  oral ABZ;  $\circ$  oral ABZ + intramuscular MEN) and ABZSO<sub>2</sub> ( $\square$  oral ABZ;  $\diamond$  oral ABZ + intramuscular MEN) obtained after oral ABZ administration (5 mg/kg) and oral ABZ (5 mg/kg) + intramuscular MEN (10 mg/kg) administration to 12 sheep.

**Supplementary Table S1.** Data from linear regression analysis of calibration curves.

| Characteristic            | ABZ                         | ABZSO                       | ABZSO <sub>2</sub>          |
|---------------------------|-----------------------------|-----------------------------|-----------------------------|
| Curve 1 (R <sup>2</sup> ) | y = 0.645 x + 0.014 (0.995) | y = 1.030 x + 0.041 (0.999) | y = 0.554 x + 0.006 (0.999) |
| Curve 2 (R <sup>2</sup> ) | y = 1.378 x + 0.013 (0.999) | y = 1.849 x + 0.009 (0.999) | y = 1.288 x – 0.007 (0.999) |
| Curve 3 (R <sup>2</sup> ) | y = 1.408 x + 0.012 (0.999) | y = 1.923 x + 0.016 (0.999) | y = 1.356 x – 0.003 (0.999) |
| LLOQ (µg/mL)              | 0.025                       | 0.025                       | 0.025                       |
| LOD (µg/mL)               | 0.001                       | 0.002                       | 0.007                       |
| Recovery (%) (Mean ± SD)  | 95.4 ± 7.2                  | 100.1 ± 6.4                 | 99.5 ± 7.2                  |

**Supplementary Table S2.** Within-run and between-run accuracy for the samples processed.

| Compound           | Nominal<br>concentration<br>(µg/mL) | Accuracy<br>(% from nominal concentration) |             | Precision<br>(% CV) |             |
|--------------------|-------------------------------------|--------------------------------------------|-------------|---------------------|-------------|
|                    |                                     | Within-run (range)                         | Between-run | Within-run (range)  | Between-run |
| ABZ                | 0.025                               | 84.7-107.2                                 | 95.7        | 4.3–10.4            | 6.8         |
|                    | 0.075                               | 86.0-96.4                                  | 92.6        | 2.1-4.2             | 3.1         |
|                    | 1                                   | 100.4-106.0                                | 102.3       | 1.9-2.4             | 2.1         |
|                    | 1.5                                 | 92.0-110.3                                 | 99.9        | 2.1-5.9             | 3.9         |
| ABZSO              | 0.025                               | 86.1-115.9                                 | 99.0        | 4.4-8.6             | 5.9         |
|                    | 0.075                               | 89.3-103.2                                 | 95.5        | 3.4-5.8             | 4.7         |
|                    | 1                                   | 97.9-112.9                                 | 103.0       | 2.1-6.4             | 3.8         |
|                    | 1.5                                 | 98.9-112.8                                 | 103.5       | 2.8–6.5             | 4.1         |
| ABZSO <sub>2</sub> | 0.025                               | 87.0-111.6                                 | 99.9        | 3.8-6.6             | 5.1         |
|                    | 0.075                               | 97.3-102.8                                 | 99.9        | 0.7–1.6             | 1.3         |
|                    | 1                                   | 87.5-110.5                                 | 101.2       | 4.1-6.2             | 4.9         |
|                    | 1.5                                 | 87.0-112.2                                 | 99.8        | 1.3–5.1             | 3.8         |

**Supplementary Table S3.** Individual and mean  $\pm$  SD plasma concentrations of ABZSO obtained after oral ABZ administration (5 mg/kg) to 12 sheep.

| Time<br>(h) | Concentrations ( $\mu\text{g/mL}$ ) |       |       |       |       |       |       |       |       |       |       |       | Mean $\pm$ SD     |
|-------------|-------------------------------------|-------|-------|-------|-------|-------|-------|-------|-------|-------|-------|-------|-------------------|
|             | 1                                   | 2     | 3     | 4     | 5     | 6     | 7     | 8     | 9     | 10    | 11    | 12    |                   |
| 0.25        |                                     |       |       |       |       |       |       |       |       |       |       |       |                   |
| 0.5         |                                     | 0.025 |       |       |       | 0.036 | 0.040 | 0.025 |       |       | 0.101 |       | 0.019 $\pm$ 0.030 |
| 1           | 0.027                               | 0.100 | 0.071 | 0.059 | 0.097 | 0.151 | 0.186 | 0.092 | 0.048 | 0.050 | 0.423 | 0.077 | 0.115 $\pm$ 0.107 |
| 2           | 0.159                               | 0.276 | 0.191 | 0.367 | 0.280 | 0.484 | 0.482 | 0.261 | 0.221 | 0.300 | 1.007 | 0.259 | 0.357 $\pm$ 0.229 |
| 4           | 0.444                               | 0.618 | 0.618 | 0.652 | 0.606 | 1.138 | 0.982 | 0.686 | 0.527 | 0.992 | 1.459 | 0.764 | 0.790 $\pm$ 0.295 |
| 6           | 0.637                               | 0.968 | 0.918 | 1.468 | 1.222 | 1.582 | 1.114 | 1.082 | 0.894 | 1.321 | 1.709 | 1.345 | 1.188 $\pm$ 0.313 |
| 8           | 0.784                               | 1.123 | 1.095 | 1.543 | 1.477 | 1.838 | 1.365 | 1.169 | 1.103 | 1.432 | 1.728 | 1.634 | 1.358 $\pm$ 0.309 |
| 10          | 0.809                               | 1.253 | 1.257 | 1.558 | 1.407 | 1.908 | 1.507 | 1.331 | 1.148 | 1.431 | 1.887 | 1.753 | 1.437 $\pm$ 0.316 |
| 12          | 0.834                               | 1.270 | 1.321 | 1.426 | 1.304 | 1.871 | 1.628 | 1.220 | 1.239 | 1.274 | 1.654 | 1.904 | 1.412 $\pm$ 0.304 |
| 18          | 0.783                               | 1.079 | 1.171 | 1.260 | 1.183 | 1.600 | 1.084 | 1.212 | 1.057 | 1.141 | 1.230 | 1.586 | 1.199 $\pm$ 0.222 |
| 24          | 0.660                               | 0.851 | 0.958 | 1.034 | 0.999 | 1.446 | 0.931 | 1.158 | 0.464 | 0.879 | 0.927 | 1.093 | 0.950 $\pm$ 0.244 |
| 30          | 0.551                               | 0.500 | 0.743 | 0.651 | 0.562 | 1.026 | 0.586 | 0.795 | 0.109 | 0.076 | 0.477 | 0.640 | 0.560 $\pm$ 0.265 |
| 36          | 0.291                               | 0.164 | 0.443 | 0.293 | 0.170 | 0.673 | 0.281 | 0.434 |       |       | 0.041 | 0.210 | 0.250 $\pm$ 0.200 |
| 48          | 0.031                               |       | 0.057 |       | 0.025 | 0.186 |       | 0.047 |       |       |       |       | 0.029 $\pm$ 0.054 |
| 60          |                                     |       |       |       |       |       |       |       |       |       |       |       | 0.053 $\pm$ 0.061 |
| 72          |                                     |       |       |       |       |       |       |       |       |       |       |       |                   |

SD: standard deviation.

**Supplementary Table S4.** Individual and mean  $\pm$  SD plasma concentrations of ABZSO obtained after oral ABZ (5 mg/kg) + intramuscular MEN (10 mg/kg) administration to 12 sheep.

| Time<br>(h) | Concentrations ( $\mu\text{g/mL}$ ) |       |       |       |       |       |       |       |       |       |       |       | Mean $\pm$ SD     |
|-------------|-------------------------------------|-------|-------|-------|-------|-------|-------|-------|-------|-------|-------|-------|-------------------|
|             | 1                                   | 2     | 3     | 4     | 5     | 6     | 7     | 8     | 9     | 10    | 11    | 12    |                   |
| 0.25        |                                     |       |       |       |       |       |       |       |       |       |       |       |                   |
| 0.5         | 0.025                               | 0.047 | 0.027 | 0.026 | 0.052 | 0.035 | 0.147 | 0.047 | 0.045 |       | 0.023 | 0.023 | 0.042 $\pm$ 0.036 |
| 1           | 0.052                               | 0.118 | 0.066 | 0.112 | 0.157 | 0.119 | 0.315 | 0.115 | 0.097 | 0.030 | 0.087 | 0.128 | 0.116 $\pm$ 0.072 |
| 2           | 0.209                               | 0.368 | 0.278 | 0.355 | 0.506 | 0.279 | 0.662 | 0.296 | 0.243 | 0.252 | 0.171 | 0.307 | 0.327 $\pm$ 0.136 |
| 4           | 0.512                               | 0.640 | 0.569 | 0.711 | 1.077 | 0.876 | 1.148 | 0.676 | 0.594 | 0.908 | 0.406 | 0.682 | 0.733 $\pm$ 0.226 |
| 6           | 0.802                               | 1.164 | 1.124 | 1.104 | 1.207 | 1.279 | 1.386 | 1.031 | 1.009 | 1.350 | 0.623 | 1.211 | 1.107 $\pm$ 0.220 |
| 8           | 0.871                               | 1.370 | 1.370 | 1.609 | 1.614 | 1.900 | 1.550 | 1.141 | 1.446 | 1.399 | 0.922 | 1.792 | 1.415 $\pm$ 0.315 |
| 10          | 1.119                               | 1.310 | 1.670 | 1.862 | 1.722 | 1.817 | 1.654 | 1.290 | 1.469 | 1.541 | 1.302 | 1.871 | 1.552 $\pm$ 0.253 |
| 12          | 1.097                               | 1.271 | 1.700 | 1.709 | 1.768 | 1.744 | 1.749 | 1.532 | 1.657 | 1.592 | 1.341 | 2.233 | 1.616 $\pm$ 0.290 |
| 18          | 1.070                               | 1.086 | 1.904 | 1.664 | 1.354 | 1.549 | 1.612 | 1.137 | 1.549 | 1.235 | 1.300 | 1.707 | 1.431 $\pm$ 0.272 |
| 24          | 0.968                               | 0.693 | 1.714 | 1.277 | 0.978 | 1.687 | 1.472 | 0.987 | 1.374 | 1.033 | 1.290 | 1.454 | 1.244 $\pm$ 0.315 |
| 30          | 0.830                               | 0.315 | 1.240 | 1.031 | 0.709 | 1.023 | 1.092 | 0.933 | 0.837 | 0.780 | 0.575 | 0.649 | 0.835 $\pm$ 0.253 |
| 36          | 0.600                               | 0.070 | 0.816 | 0.449 | 0.178 | 0.512 | 0.662 | 0.407 | 0.345 | 0.176 | 0.294 | 0.345 | 0.404 $\pm$ 0.218 |
| 48          | 0.073                               |       | 0.211 | 0.025 |       | 0.061 | 0.098 | 0.081 | 0.029 |       | 0.061 |       |                   |
| 60          |                                     |       |       |       |       |       |       |       |       |       |       |       |                   |
| 72          |                                     |       |       |       |       |       |       |       |       |       |       |       |                   |

SD: standard deviation.

**Supplementary Table S5.** Individual and mean  $\pm$  SD plasma concentrations of ABZSO<sub>2</sub> obtained after oral ABZ administration (5 mg/kg) to 12 sheep.

| Time<br>(h) | Concentrations ( $\mu\text{g/mL}$ ) |       |       |       |       |       |       |       |       |       |       |       | Mean $\pm$ SD     |
|-------------|-------------------------------------|-------|-------|-------|-------|-------|-------|-------|-------|-------|-------|-------|-------------------|
|             | 1                                   | 2     | 3     | 4     | 5     | 6     | 7     | 8     | 9     | 10    | 11    | 12    |                   |
| 0.25        |                                     |       |       |       |       |       |       |       |       |       |       |       |                   |
| 0.5         |                                     |       |       |       |       |       |       |       |       |       |       |       |                   |
| 1           |                                     |       |       |       |       |       |       |       |       |       |       |       |                   |
| 2           | 0.027                               | 0.027 |       |       |       | 0.056 | 0.029 |       |       |       | 0.079 |       | 0.018 $\pm$ 0.025 |
| 4           | 0.046                               | 0.066 | 0.027 | 0.057 | 0.055 | 0.121 | 0.076 | 0.051 | 0.058 | 0.103 | 0.188 | 0.062 | 0.076 $\pm$ 0.042 |
| 6           | 0.090                               | 0.138 | 0.075 | 0.202 | 0.153 | 0.188 | 0.131 | 0.135 | 0.145 | 0.209 | 0.280 | 0.158 | 0.159 $\pm$ 0.053 |
| 8           | 0.150                               | 0.199 | 0.132 | 0.288 | 0.240 | 0.257 | 0.216 | 0.190 | 0.232 | 0.316 | 0.363 | 0.254 | 0.236 $\pm$ 0.063 |
| 10          | 0.182                               | 0.290 | 0.196 | 0.378 | 0.299 | 0.319 | 0.235 | 0.278 | 0.312 | 0.414 | 0.460 | 0.412 | 0.315 $\pm$ 0.084 |
| 12          | 0.242                               | 0.359 | 0.256 | 0.411 | 0.343 | 0.418 | 0.333 | 0.297 | 0.379 | 0.468 | 0.628 | 0.374 | 0.376 $\pm$ 0.099 |
| 18          | 0.345                               | 0.514 | 0.363 | 0.568 | 0.544 | 0.583 | 0.314 | 0.517 | 0.563 | 0.716 | 0.728 | 0.637 | 0.533 $\pm$ 0.129 |
| 24          | 0.413                               | 0.673 | 0.518 | 0.678 | 0.803 | 0.608 | 0.400 | 0.749 | 0.762 | 1.022 | 0.783 | 0.689 | 0.675 $\pm$ 0.167 |
| 30          | 0.510                               | 0.707 | 0.643 | 0.669 | 1.012 | 0.683 | 0.383 | 0.770 | 0.314 | 0.613 | 0.743 | 0.705 | 0.646 $\pm$ 0.175 |
| 36          | 0.538                               | 0.625 | 0.732 | 0.664 | 0.644 | 0.618 | 0.378 | 0.854 | 0.027 | 0.144 | 0.280 | 0.593 | 0.508 $\pm$ 0.238 |
| 48          | 0.052                               | 0.027 | 0.431 | 0.028 | 0.027 | 0.061 | 0.027 | 0.093 |       | 0.025 | 0.025 | 0.025 | 0.068 $\pm$ 0.112 |
| 60          |                                     |       | 0.025 |       |       | 0.025 |       | 0.025 |       |       |       |       | 0.006 $\pm$ 0.011 |
| 72          |                                     |       |       |       |       |       |       |       |       |       |       |       |                   |

SD: standard deviation.

**Supplementary Table S6.** Individual and mean  $\pm$  SD plasma concentrations of ABZSO<sub>2</sub> obtained after oral ABZ (5 mg/kg) + intramuscular MEN (10 mg/kg) administration to 12 sheep.

| Time<br>(h) | Concentrations ( $\mu\text{g/mL}$ ) |       |       |       |       |       |       |       |       |       |       |       | Mean $\pm$ SD     |
|-------------|-------------------------------------|-------|-------|-------|-------|-------|-------|-------|-------|-------|-------|-------|-------------------|
|             | 1                                   | 2     | 3     | 4     | 5     | 6     | 7     | 8     | 9     | 10    | 11    | 12    |                   |
| 0.25        |                                     |       |       |       |       |       |       |       |       |       |       |       |                   |
| 0.5         |                                     |       |       |       |       |       |       |       |       |       |       |       |                   |
| 1           |                                     |       |       |       |       |       |       |       |       |       |       |       |                   |
| 2           |                                     |       |       |       |       |       |       |       |       |       |       |       |                   |
| 4           | 0.025                               | 0.060 | 0.045 | 0.047 | 0.062 | 0.027 | 0.030 | 0.025 | 0.058 | 0.142 | 0.120 | 0.195 | 0.070 $\pm$ 0.054 |
| 6           | 0.063                               | 0.131 | 0.111 | 0.121 | 0.097 | 0.063 | 0.102 | 0.058 | 0.132 | 0.252 | 0.198 | 0.303 | 0.136 $\pm$ 0.077 |
| 8           | 0.083                               | 0.212 | 0.173 | 0.191 | 0.189 | 0.150 | 0.126 | 0.130 | 0.239 | 0.322 | 0.246 | 0.375 | 0.203 $\pm$ 0.083 |
| 10          | 0.142                               | 0.268 | 0.253 | 0.310 | 0.275 | 0.216 | 0.189 | 0.176 | 0.313 | 0.413 | 0.248 | 0.410 | 0.268 $\pm$ 0.085 |
| 12          | 0.186                               | 0.336 | 0.307 | 0.370 | 0.354 | 0.272 | 0.258 | 0.255 | 0.403 | 0.505 | 0.244 | 0.557 | 0.337 $\pm$ 0.110 |
| 18          | 0.290                               | 0.516 | 0.531 | 0.555 | 0.506 | 0.460 | 0.384 | 0.322 | 0.569 | 0.601 | 0.345 | 0.664 | 0.479 $\pm$ 0.119 |
| 24          | 0.395                               | 0.577 | 0.666 | 0.676 | 0.639 | 0.802 | 0.530 | 0.417 | 0.723 | 0.698 | 0.485 | 0.789 | 0.616 $\pm$ 0.136 |
| 30          | 0.491                               | 0.589 | 0.717 | 0.842 | 0.873 | 0.820 | 0.676 | 0.647 | 0.798 | 0.730 | 0.388 | 0.666 | 0.686 $\pm$ 0.145 |
| 36          | 0.608                               | 0.379 | 0.778 | 0.708 | 0.404 | 0.767 | 0.581 | 0.516 | 0.682 | 0.445 | 0.373 | 0.577 | 0.568 $\pm$ 0.147 |
| 48          | 0.140                               | 0.025 | 0.494 | 0.029 | 0.025 | 0.039 | 0.239 | 0.028 | 0.025 | 0.025 | 0.030 | 0.025 | 0.094 $\pm$ 0.142 |
| 60          |                                     |       |       |       |       |       |       |       |       |       |       |       |                   |
| 72          |                                     |       |       |       |       |       |       |       |       |       |       |       |                   |

SD: standard deviation.
